# Supplementary material for: Neoadjuvant Chemoradiotherapy versus Chemotherapy for Gastroesophageal Junction Adenocarcinoma; Which Is the Optimal Treatment Option?
Source: MDPI journal article supplement (doi:10.3390/cancers14235856), 2022-11-28
Supplement: s1 [file s1]

# Supplementary Materials: Neoadjuvant Chemoradiotherapy Versus Chemotherapy for Gastroesophageal Junction Adenocarcinoma; Which Is the Optimal Treatment Option?

Eric Zandirad, Hugo Teixeira Farinha, Beatriz Barberá–Carbonell, Sandrine Geinoz, Nicolas Demartines, Markus Schäfer and Styliani Mantziari

**Table S1.** Logistic regression analysis for complete pathologic response (TRG1).

|                        | Unadjusted OR | 95%CI     | P-value |
|------------------------|---------------|-----------|---------|
| % Baseline weight loss | 1.03          | 0.88–1.19 | 0.669   |
| cT stage               |               |           |         |
| 2                      | 1             |           |         |
| 3–4                    | 0.34          | 0.06–2.62 | 0.236   |
| cN stage               |               |           |         |
| 0                      | 1             |           |         |
| 1                      | 0.34          | 0.07–1.59 | 0.158   |
| 2–3                    | 1.50          | 0.24–8.52 | 0.644   |
| Differentiation grade  |               |           |         |
| G1                     | 1             |           |         |
| G2                     | 0.75          | 0.09–16.0 | 0.811   |
| G3                     | 0.22          | 0.02–5.39 | 0.259   |
| Baseline SUVmax        | 0.98          | 0.88–1.07 | 0.796   |
| Signet–ring histology  | 0.41          | 0.02–2.44 | 0.419   |
| HER2+ status           | 1.50          | 0.16–14.2 | 0.707   |
| NAT type               |               |           |         |
| RCT                    | 1             |           |         |
| CT                     | 0.518         | 0.07–2.20 | 0.423   |

As only cN status had  $p < 0.2$  in univariate analysis (simple logistic regression), multivariate analysis was not performed.

**Table S2.** Cox regression analysis for Overall Survival (OS).

|                        | Unadjusted OR | 95%CI     | P-value | Adjusted OR | 95%CI | P-value |
|------------------------|---------------|-----------|---------|-------------|-------|---------|
| % Baseline weight loss | 1.02          | 0.93–1.11 | 0.698   |             |       |         |
| cT stage               |               |           |         |             |       |         |
| 2                      | 1             |           | 0.652   |             |       |         |
| 3                      | 1.59          | 0.21–12.2 |         |             |       |         |
| cN stage               |               |           |         |             |       |         |
| 0                      | 1             |           |         |             |       |         |
| 1                      | 1.48          | 0.42–5.21 | 0.538   |             |       |         |
| 2–3                    | 0.54          | 0.05–5.23 | 0.597   |             |       |         |
| SUVmax                 | 0.96          | 0.89–1.03 | 0.301   |             |       |         |
| Signet–ring histology  | 0.76          | 0.22–2.59 | 0.665   |             |       |         |
| HER2+ status           | 0.24          | 0.02–2.45 | 0.23    |             |       |         |
| NAT type               |               |           |         |             |       |         |
| RCT                    | 1             |           | 0.269   |             |       |         |
| CT                     | 0.50          | 0.14–1.71 |         |             |       |         |
| RCT dose               |               |           |         |             |       |         |
| 41.4Gy                 | 1             |           |         |             |       |         |
| 45Gy                   | 2.24          | 0.57–8.79 | 0.246   |             |       |         |
| 50.4Gy                 | 2.22          | 0.57–8.62 | 0.248   |             |       |         |
| pT status              |               |           |         |             |       |         |
| 0                      | 1             |           |         | 1           |       |         |

|                     |       |            |       |      |            |       |
|---------------------|-------|------------|-------|------|------------|-------|
| 1                   | 3.08  | 0.31–30.3  | 0.334 | 1.08 | 0.29–29.4  | 0.358 |
| 2                   | 5.89  | 0.66–52.9  | 0.113 | 1.36 | 0.41–31.17 | 0.232 |
| 3                   | 3.13  | 0.40–24.3  | 0.276 | 0.73 | 0.25–17.01 | 0.494 |
| 4                   | 6.15  | 0.37–102.2 | 0.205 | 1.86 | 0.32–126.8 | 0.221 |
| cN status           |       |            |       |      |            |       |
| 0                   | 1     |            |       | 1    |            |       |
| 1                   | 2.10  | 0.68–6.52  | 0.197 | 2.21 | 0.68–7.19  | 0.189 |
| 2                   | 2.71  | 0.92–7.94  | 0.069 | 4.00 | 1.22–13.17 | 0.022 |
| 3                   | 0.97  | 0.12–7.92  | 0.981 | 1.32 | 0.13–13.10 | 0.811 |
| pCR                 | 0.274 | 0.03–2.07  | 0.210 |      |            |       |
| R1 resection        | 1.60  | 0.51–5.04  | 0.422 |      |            |       |
| Major Complications | 2.57  | 1.09–6.06  | 0.031 | 1.15 | 1.21–8.12  | 0.018 |

Variables with  $p < 0.2$  in univariate analysis were included in the multivariate model.

**Table S3.** Cox regression analysis of Disease-Free Survival (DFS).

|                               | Unadjusted<br>OR | 95%CI     | P-value | Adjusted<br>OR | 95%CI     | P-value |
|-------------------------------|------------------|-----------|---------|----------------|-----------|---------|
| cT status                     |                  |           |         |                |           |         |
| 2                             | 1                |           | 0.334   |                |           |         |
| 3                             | 2.01             | 0.49–8.35 |         |                |           |         |
| cN status                     |                  |           |         |                |           |         |
| 0                             | 1                |           |         |                |           |         |
| 1                             | 1.32             | 0.60–2.91 | 0.484   |                |           |         |
| 2–3                           | 1.46             | 0.53–4.04 | 0.465   |                |           |         |
| Differentiation<br>grade      |                  |           |         |                |           |         |
| 1                             | 1                |           |         | 1              |           |         |
| 2                             | 1.68             | 0.39–7.28 | 0.485   | 1.19           | 0.25–5.75 | 0.821   |
| 3                             | 2.89             | 0.67–12.4 | 0.153   | 1.97           | 0.42–9.18 | 0.387   |
| SUVmax                        | 1.01             | 0.97–1.05 | 0.635   |                |           |         |
| Signet-ring cell<br>histology | 1.39             | 0.69–2.82 | 0.359   |                |           |         |
| HER2+ status                  | 0.38             | 0.09–1.49 | 0.167   |                |           |         |
| NAT type                      |                  |           |         |                |           |         |
| RCT                           | 1                |           | 0.753   |                |           |         |
| CT                            | 0.903            | 0.47–1.71 |         |                |           |         |
| pT status                     |                  |           |         |                |           |         |
| 0                             | 1                |           |         | 1              |           |         |
| 1                             | 0.25             | 0.05–1.27 | 0.094   | 0.19           | 0.03–1.12 | 0.066   |
| 2                             | 0.95             | 0.27–3.38 | 0.937   | 0.52           | 0.09–2.95 | 0.466   |
| 3                             | 1.04             | 0.44–2.50 | 0.919   | 0.46           | 0.13–1.58 | 0.219   |
| 4                             | 6.32             | 1.49–26.8 | 0.012   | 0.91           | 0.06–13.9 | 0.947   |
| pN status                     |                  |           |         |                |           |         |
| 0                             | 1                |           |         | 1              |           |         |
| 1                             | 2.49             | 1.16–5.36 | 0.019   | 1.94           | 0.74–5.10 | 0.177   |
| 2                             | 3.55             | 1.67–7.55 | <0.001  | 3.32           | 1.32–8.35 | 0.011   |
| 3                             | 4.61             | 1.94–10.9 | <0.001  | 4.85           | 1.25–18.8 | 0.022   |
| TRG1                          | 1.09             | 0.46–2.57 | 0.848   |                |           |         |
| R1 resection                  | 2.40             | 1.22–4.71 | 0.011   | 1.28           | 0.49–3.34 | 0.614   |
| Major complica-<br>tions      | 0.64             | 0.34–1.21 | 0.172   | 0.741          | 0.34–1.62 | 0.452   |

Variables with  $p < 0.2$  in univariate analysis were included in the multivariate model.
